# Supplementary material for: The Influenza Virus H5N1 Infection Can Induce ROS Production for Viral Replication and Host Cell Death in A549 Cells Modulated by Human Cu/Zn Superoxide Dismutase (SOD1) Overexpression
Source: MDPI journal article supplement (doi:10.3390/v8010013), 2016-01-08
Supplement: s1 [file s1]

# Supplementary Materials: The Influenza Virus H5N1 Infection Can Induce ROS Production for Viral Replication and Host Cell Death in A549 Cells that Modulated by Human Cu/Zn Superoxide Dismutase (SOD1) Overexpression

Xian Lin, Ruifang Wang, Wei Zou, Xin Sun, Xiaokun Liu, Lianzhong Zhao, Shengyu Wang and Meilin Jin

Table S1. Primers used in RT-PCR.

| Genes         | Forward sequences        | Reverse sequences        |
|---------------|--------------------------|--------------------------|
| NOX1          | CGCCCTTGCTTCTATCTTG      | AATTCCTCCATCTCCTGTTCC    |
| NOX2          | AAGATAGCGGTTGATGGGC      | TTGAGAATGGATGCGAAGG      |
| NOX3          | CTAAGGACAATAGCAGGCGTCA   | GCCAGGCTGAGAAAGAAGACG    |
| NOX4          | TTTTCCCAGGTAGGGTTTGT     | CACATGATGTCCTTTGGTCTCA   |
| NOX5          | CTGGTGCCTGGAATCTTGTTTT   | CTTGGAGGGGAGGAGGTTGA     |
| DUOX1         | GACAAGGATGGCAATGGCTAC    | ATGCGGAACATAAGGCGAGAC    |
| DUOX2         | TGCCATCACCATCATTGCTCT    | GCTGCTTCCTTCTTCACGCT     |
| Nrf2          | TCCAGTCAGAAACCAGTGGAT    | GAATGTCTGCGCCAAAAGCTG    |
| SOD1          | TGGATCTGCCAACTACTCCC     | CGTAGCCGAAGAAACCTCAT     |
| SOD2          | TGGACAAACCTCAGCCCTAA     | TTGAAACCAAGCCAACCC       |
| SOD3          | CGCCTTCTTCGCCCTGGAG      | TCAGGTCCCCGAACCTGGTG     |
| Catalase      | CTGTTGAAGATGCGGCGAGAC    | TCCTGTGGCAATGGCGTTA      |
| NP            | CAGCGTTCAGCCCACTTTCT     | GGGTTCGTTGCCTTTTCGTC     |
| IL-6          | AGGAGACTTGCCTGGTGAAG     | CAGGGGTGGTTATTGCATCT     |
| IL-8          | TTGGCAGCCTTCCTGATTTC     | TCTTTAGCACTCCTTGGCAAAAC  |
| TNF- $\alpha$ | ACGGCATGGATCTCAAAGACAACC | TGAGATAGCAAATCGGCTGACGGT |
| CCL2          | GCAATCAATGCCCCAGTCA      | GCCTCTGCACTGAGATCTTCCT   |
| GAPDH         | GCTAAGGCTGTGGGCAAGG      | GGAGGAGTGGGTGTCGCTG      |

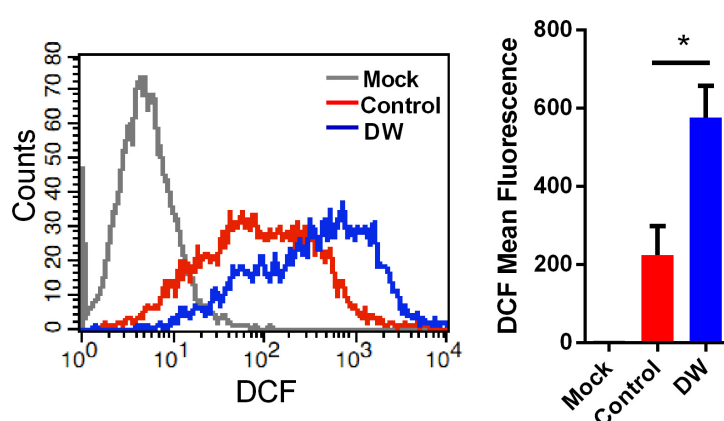

**Figure S1.** DW infection induced significant ROS production in mouse primary lung epithelial cells. Primary mouse lung epithelial cells were infected by DW at 1 MOI, 24 hpi, DCF mean fluorescence was detected by Flow cytometry. \*  $p < 0.05$ .

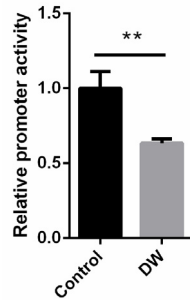

**Figure S2.** DW infection decreased SOD1 promoter activity. PGL3-basic vector containing proximal region (-200 to +1) of human SOD1 gene was transfected into A549 cells, 24 h after transfection, cells were infected by control or DW at 1 MOI. 12 hpi, fluorescence was detected using a dual-luciferase reporter assay system (Promega). \*\*  $p < 0.01$ .

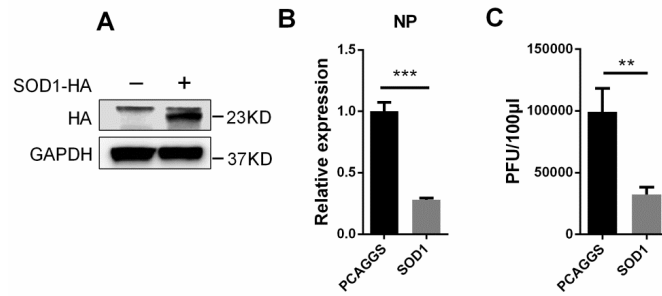

**Figure S3.** SOD1 overexpression inhibited viral replication in mouse primary lung epithelial cells. (A) SOD1 overexpression was verified 24 h after transfection; Primary mouse lung epithelial cells were infected by DW at 1 MOI, 24 hpi; (B) mRNA of viral NP was detected by qRT-PCR; and (C) viral titers in the supernatant were detected by plaque assay. \*\*  $p < 0.01$ , \*\*\*  $p < 0.001$ .

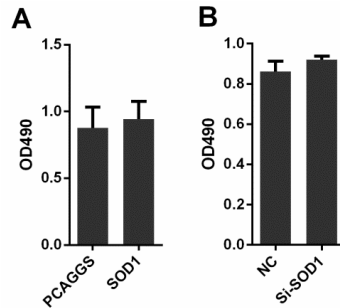

**Figure S4.** Cell viability test. A549 cells were transfected with PCAGGS or SOD1 (A) or siRNA (B), 36 h after transfection, cell viability was determined by MTT assay (Promega).

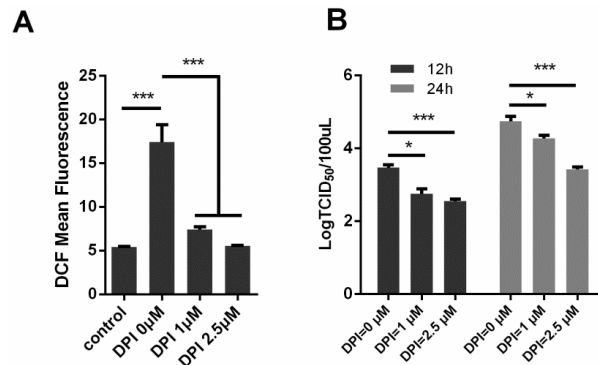

**Figure S5.** DPI inhibited virus induced ROS production and viral replication. A549 cells were pretreated with DPI, 24 hpi, (A) ROS production was detected by measuring DCF mean fluorescence via Flow cytometry; (B) viral titers were detected by TCID<sub>50</sub> assay. \*  $p < 0.05$ , \*\*  $p < 0.01$ , \*\*\*  $p < 0.001$ .

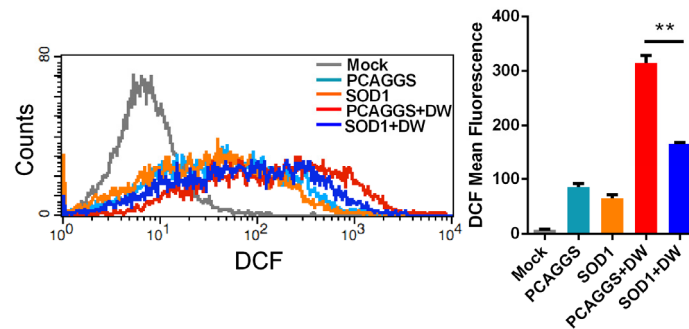

**Figure S6.** SOD1 overexpression inhibited ROS infection in mouse primary lung epithelial cells induced by DW infection at 1 MOI. ROS production was detected by measuring DCF mean fluorescence via Flow cytometry. \*\*  $p < 0.01$ .

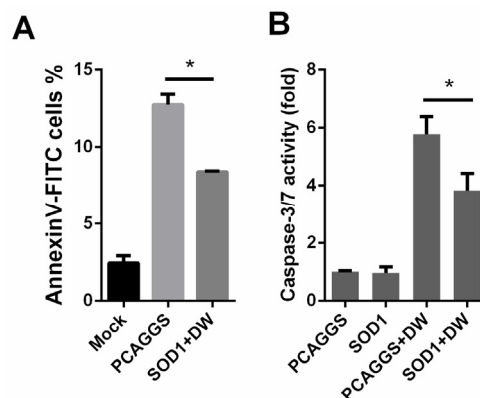

**Figure S7.** SOD1 overexpression inhibited virus induced apoptosis in mouse primary lung epithelial cells. Cells were infected by DW at 1 MOI, 24 hpi, (A) cells apoptosis was detected by Flow cytometry; (B) caspase-3/7 activity was tested using Caspase-Glo 3/7 assay kit. \*  $p < 0.05$ .

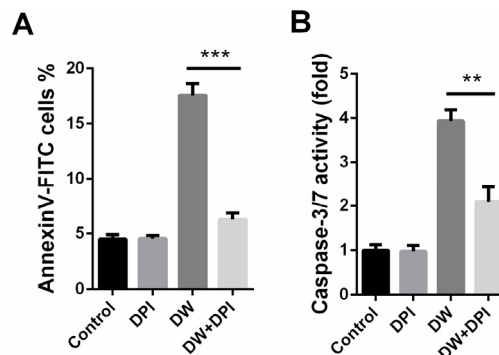

**Figure S8.** DPI inhibited virus induced apoptosis in A549 cells. A549 cells were pretreated with 2  $\mu$ M DPI for 1 h, 24 hpi, (A) cells apoptosis was detected by Flow cytometry; (B) caspase 3/7 activity was tested using Caspase-Glo 3/7 assay kit. \*\*  $p < 0.01$ , \*\*\*  $p < 0.001$ .

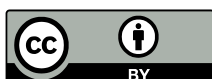

© 2016 by the authors; licensee MDPI, Basel, Switzerland. This article is an open access article distributed under the terms and conditions of the Creative Commons by Attribution (CC-BY) license (<http://creativecommons.org/licenses/by/4.0/>).
